# Supplementary material
Source: publisher site journal article supplement (https://www.dovepress.com/article/231750)
Supplement: Supplementary file 1 [file get_supplementary_file.php]

| **Table S1 Characteristics of DUXAP8 expression datasets obtained from TCGA** | | | | | | | | | | | | |
| --- | --- | --- | --- | --- | --- | --- | --- | --- | --- | --- | --- | --- |
| **Study** | **Cancer type** | **Tumor tissue samples** | | | **Normal tissue samples** | | | **AUC(95% CI)** | **TP** | **FP** | **FN** | **TN** |
| **NO.** | **Mean** | **SD** | **NO.** | **Mean** | **SD** |
| TCGA-BLCA | Bladder urothelial carcinoma | 411 | 7.203 | 0.116 | 19 | 3.767 | 0.517 | 0.849 (0.763 - 0.936) | 332 | 3 | 79 | 16 |
| TCGA-BRCA | Breast invasive carcinoma | 1104 | 7.380 | 0.045 | 113 | 7.286 | 0.089 | 0.515 (0.471 - 0.559) | 557 | 58 | 547 | 55 |
| TCGA-CHOL | Cholangiocarcinoma | 36 | 5.114 | 0.350 | 9 | 3.080 | 0.327 | 0.789 (0.668 - 0.928) | 23 | 0 | 13 | 9 |
| TCGA-COAD | Colon adenocarcinoma | 471 | 4.668 | 0.101 | 41 | 2.538 | 0.169 | 0.808 (0.760 - 0.885) | 289 | 2 | 182 | 39 |
| TCGA-ESCA | Esophageal carcinoma | 162 | 8.567 | 0.150 | 11 | 4.892 | 0.603 | 0.892 (0.776 - 1.008) | 151 | 2 | 11 | 9 |
| TCGA-HNSC | Head and neck squamous cell carcinoma | 502 | 6.887 | 0.100 | 44 | 3.510 | 0.236 | 0.880 (0.841 - 0.919) | 359 | 5 | 143 | 39 |
| TCGA-KICH | Kidney chromophobe | 65 | 4.449 | 0.232 | 24 | 4.065 | 0.261 | 0.566 (0.448 - 0.685) | 33 | 9 | 32 | 15 |
| TCGA-KIRC | Kidney renal clear cell carcinoma | 535 | 6.573 | 0.069 | 72 | 4.176 | 0.154 | 0.879 (0.844 - 0.914) | 405 | 8 | 130 | 64 |
| TCGA-KIRP | Kidney renal papillary cell carcinoma | 289 | 4.736 | 0.131 | 32 | 3.743 | 0.232 | 0.634 (0.563 - 0.706) | 159 | 11 | 130 | 21 |
| TCGA-LIHC | Hepatocellular carcinoma | 374 | 5.221 | 0.116 | 50 | 2.470 | 0.185 | 0.843 (0.803 - 0.882) | 269 | 5 | 105 | 45 |
| TCGA-LUAD | Lung adenocarcinoma | 526 | 6.413 | 0.091 | 59 | 4.327 | 0.143 | 0.801 (0.760 - 0.842) | 360 | 8 | 166 | 51 |
| TCGA-LUSC | Lung squamous cell carcinoma | 501 | 7.842 | 0.078 | 49 | 5.058 | 0.158 | 0.902 (0.874 - 0.930) | 383 | 1 | 118 | 48 |
| TCGA-PRAD | Prostate adenocarcinoma | 499 | 7.411 | 0.072 | 52 | 6.416 | 0.278 | 0.636 (0.562 - 0.711) | 276 | 18 | 223 | 34 |
| TCGA-READ | Rectum adenocarcinoma | 167 | 4.833 | 0.187 | 10 | 2.622 | 0.347 | 0.780 (0.680 - 0.880) | 115 | 2 | 52 | 8 |
| TCGA-STAD | Stomach adenocarcinoma | 375 | 7.620 | 0.983 | 32 | 4.087 | 0.246 | 0.931 (0.902 - 0.961) | 301 | 1 | 74 | 31 |
| TCGA-THCA | Thyroid carcinoma | 510 | 4.980 | 0.068 | 58 | 3.072 | 0.164 | 0.843 (0.800 - 0.885) | 391 | 15 | 119 | 43 |
| TCGA-UCEC | Uterine corpus endometrial carcinoma | 548 | 5.502 | 0.106 | 35 | 4.565 | 0.224 | 0.612 (0.548 - 0.675) | 313 | 14 | 235 | 21 |
| **Abbreviations：**TP=true positive; FP=false positive; FN=false negative; TN=true negative. | | | | | | | | | | | | |

| **Table S2 Analysis of overall survival in studies included in this study** | | | | | |
| --- | --- | --- | --- | --- | --- |
| **Study** | **Type of cancer** | **Sample size** | **Outcome** | **Cutoff** | **HR（95% CI）** |
| TCGA-BLCA | Bladder urothelial carcinoma | 404 | OS | median | 0.95 (0.71 - 1.28) |
| TCGA-BRCA | Breast invasive carcinoma | 1089 | OS | median | 1.22 (0.89 - 1.68) |
| TCGA-CESC | Cervical squamous cell carcinoma and endocervical adenocarcinoma | 304 | OS | median | 1.00 (0.63 - 1.59) |
| TCGA-CHOL | Cholangiocarcinoma | 36 | OS | median | 1.14 (0.45 - 2.88) |
| TCGA-COAD | Colon adenocarcinoma | 438 | OS | median | 1.51 (1.01 - 2.24) |
| TCGA-ESCA | Esophageal carcinoma | 161 | OS | median | 1.04 (0.64 - 1.70) |
| TCGA-HNSC | Head and neck squamous cell carcinoma | 499 | OS | median | 1.12 (0.86 -1.46) |
| TCGA-KIRC | Kidney renal clear cell carcinoma | 530 | OS | median | 2.21 (1.61 - 3.03) |
| TCGA-KIRP | Kidney renal papillary cell carcinoma | 287 | OS | median | 3.10 (1.59 - 6.03) |
| TCGA-LIHC | Liver hepatocellular carcinoma | 365 | OS | median | 1.91 (1.35 - 2.70) |
| TCGA-LUAD | Lung adenocarcinoma | 504 | OS | median | 1.30 (0.97 - 1.73) |
| TCGA-LUSC | Lung squamous cell carcinoma | 495 | OS | median | 0.98 (0.75 - 1.28) |
| TCGA-OV | Ovarian serous cystadenocarcinoma | 373 | OS | median | 1.03 (0.80 - 1.34) |
| TCGA-PAAD | Pancreatic adenocarcinoma | 177 | OS | median | 1.15 (0.76 - 1.74) |
| TCGA-PCPG | Pheochromocytoma and paraganglioma | 178 | OS | median | 1.08 (0.22 - 5.37) |
| TCGA-READ | Rectum adenocarcinoma | 160 | OS | median | 0.52 (0.24 - 1.13) |
| TCGA-SARC | Sarcoma | 259 | OS | median | 1.35 (0.90 - 2.00) |
| TCGA-STAD | Stomach adenocarcinoma | 371 | OS | median | 1.20 (0.87 - 1.66) |
| TCGA-TGCT | Testicular germ cell tumors | 134 | OS | median | 1.49 (0.20 - 11.0) |
| TCGA-THCA | Thyroid carcinoma | 502 | OS | median | 2.56 (0.89 - 7.37) |
| TCGA-THYM | Thymoma | 118 | OS | median | 2.38 (0.59 - 9.55) |
| TCGA-UCEC | Uterine corpus endometrial carcinoma | 542 | OS | median | 1.74 (1.14 - 2.65) |
| Sun et al.9 | Lung carcinoma | 78 | OS | median | 2.78 (1.13 - 6.88) |
| Ma et al.10 | Gastric carcinoma | 72 | OS | median | 2.15 (1.01 - 4.79) |
| Xu et al.11 | Esophageal carcinoma | 78 | OS | median | 1.41 (0.61 - 3.27) |
| Lian et al.12 | Pancreatic carcinoma | 58 | OS | median | 2.61 (1.25 - 5.43) |
| Zhao et al.13 | Glioma | 58 | OS | median | 1.87 (0.88 - 3.95) |
| Liu et al.14 | Bladder carcinoma | 31 | OS | median | 2.18 (0.56 - 8.46) |
| **Abbreviations：**OS = overall survival | | | | | |
